# Supplementary material for: A primary care Symptoms Clinic for patients with medically unexplained symptoms: pilot randomised trial
Source: PubMed Central journal article supplement — BMJ Open. 2012 Feb 9;2(1):e000513. doi: 10.1136/bmjopen-2011-000513 (PMC3330253; doi:10.1136/bmjopen-2011-000513), 2012-02-09
Supplement: bmjopen-2011-000513-s2.pdf [file bmjopen-2011-000513-s2.pdf]

## Appendix 1.

### **Section A – specified outpatient clinics**

Search specification includes all referrals except to the following

X-ray

Radiology

Family Planning & Women's Health

Physiotherapy

Dietetics

Obstetrics

Audiology

Chiropody / podiatry

Psychology / Psychiatry

### **Section B – read codes for exclusion medical conditions**

B...1 Cancer

C10.. Diabetes

E00.. Dementia

E10.. Psychosis

F12.. Parkinsons Disease

G3... Coronary Heart Disease

G58.. Heart Failure

G6... Cerebrovascular Disease

H3z.. COPD

N04.. Rheumatoid Arthritis

Read codes have 5 characters and are arranged in a hierarchy. Where shorter codes are stated, all codes beginning with the stated code are included in the search.

### **Section C - read codes indicating MUS**

E278. Tension headache, psychogenic pain

F2626 Tension headache

F286. Chronic Fatigue Syndrome

J0464 Temporomandibular pain disorder

R0400 Facial Pain  
J521. Irritable Bowel Syndrome  
K58y0 Pelvic Pain  
R090G Pelvic & Perineal Pain  
R065B Non-cardiac chest pain  
N239. Fibromyalgia  
N248. Fibromyalgia  
Eu45. Somatoform disorders (incl globus)  
R00zC Chronic Intractable Pain  
E2016 Other Conversion Disorder  
Eu44. Dissociative disorders  
Eu5z. Unspecified behavioural with physiological components  
32130 Exercise ECG normal  
33B93 Exercise Test Normal  
3614. Normal endoscopy  
3617. Normal colonoscopy  
361A. Normal sigmoidoscopy  
5532. Normal Coronary angio  
5542. Normal Coronary angio  
5692. Normal MRI  
569F. Normal MRI of brain
